# Supplementary material for: A Missense Variant in COMT Associated with Hearing Loss among Young Adults: The National Longitudinal Study of Adolescent to Adult Health (Add Health)
Source: MDPI journal article supplement (doi:10.3390/biomedicines10112756), 2022-10-31
Supplement: s1 [file s1]

## Article

# A Missense Variant in *COMT* Associated with Hearing Loss among Young Adults: The National Longitudinal Study of Adolescent to Adult Health (Add Health)

Chuan-Ming Li <sup>1,\*</sup>, Le Chen <sup>1</sup>, Guanjie Chen <sup>2</sup>, Jianhua Zhang <sup>3</sup> and Howard J. Hoffman <sup>1,\*</sup>

<sup>1</sup> Epidemiology and Statistics Program, Division of Scientific Programs, National Institute on Deafness and Other Communication Disorders (NIDCD), National Institutes of Health (NIH), Bethesda, MD 20892, USA

<sup>2</sup> Center for Research on Genomics and Global Health, National Human Genome Research Institute, National Institutes of Health (NIH), Bethesda, MD 20892, USA

<sup>3</sup> Metabolic Disease Branch, National Institute of Diabetes and Digestive and Kidney Diseases (NIDDK), National Institutes of Health (NIH), Bethesda, MD 20892, USA

\* Correspondence: chuan-ming.li@nih.gov (C.-M.L.); howard.hoffman@nih.gov (H.J.H.); Tel.: +1-301-435-1351 (C.-M.L.); +1-301-435-1349 (H.J.H.)

**Citation:** Li, C.-M.; Chen, L.; Chen, G.; Zhang, J.; Hoffman, H.J. A Missense Variant in *COMT* Associated with Hearing Loss among Young Adults: The National Longitudinal Study of Adolescent to Adult Health (Add Health). *Biomedicines* **2022**, *10*, 2756. <https://doi.org/10.3390/biomedicines10112756>

Academic Editor: Anna Morgan

Received: 24 September 2022

Accepted: 20 October 2022

Published: 31 October 2022

**Publisher's Note:** MDPI stays neutral with regard to jurisdictional claims in published maps and institutional affiliations.

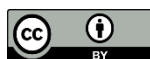

**Copyright:** © 2022 by the authors. Licensee MDPI, Basel, Switzerland. This article is an open access article distributed under the terms and conditions of the Creative Commons Attribution (CC BY) license (<https://creativecommons.org/licenses/by/4.0/>).

**Supplementary Materials:** The following supporting information can be downloaded at: <https://www.mdpi.com/article/10.3390/biomedicines10112756/s1>, **Table S1:** Associations between hearing loss and allele and genotype of rs1800497 and rs1800497; **Figure S1:** Prevalence of hearing loss by allele and genotype of rs1800497; **Figure S2:** Prevalence of hearing loss by allele and genotype of rs12945042.

**Table S1.** Associations between hearing loss and allele and genotype of. rs1800497 and rs1800497

| SNP                                               | Model *                                             | $\beta$ Estimates (95% CI) | Weight |
|---------------------------------------------------|-----------------------------------------------------|----------------------------|--------|
| rs800497 ( <i>DRD2</i> ) Allele (A vs. G)         | Non-Hispanic White                                  | -0.05 (-0.19 - 0.09)       | 67.8%  |
|                                                   | Non-Hispanic Black                                  | -0.06 (-0.34 - 0.22)       | 16.5%  |
|                                                   | Hispanic                                            | -0.23 (-0.58 - 0.13)       | 10.9%  |
|                                                   | Non-Hispanic Asian                                  | -0.15 (-0.68 - 0.38)       | 4.8%   |
|                                                   | Meta-analysis                                       | -0.08 (-0.19 - 0.04)       |        |
|                                                   | <i>P</i> value                                      | 0.1940                     |        |
|                                                   | <b>Genotype (additive model)</b><br>(reference: GG) |                            |        |
|                                                   | Non-Hispanic White                                  | -0.06 (-0.20 - 0.08)       | 67.6%  |
|                                                   | Non-Hispanic Black                                  | -0.07 (-0.35 - 0.21)       | 16.0%  |
|                                                   | Hispanic                                            | -0.20 (-0.55 - 0.14)       | 10.9%  |
| rs12945042 (near <i>SLC6A4</i> ) Allele (C vs. T) | Non-Hispanic Asian                                  | -0.05 (-0.53 - 0.44)       | 5.5%   |
|                                                   | Meta-analysis                                       | -0.08 (-0.19 - 0.04)       |        |
|                                                   | <i>P</i> value                                      | 0.1899                     |        |
|                                                   | <b>Genotype (additive model)</b><br>(reference: TT) |                            |        |
|                                                   | Non-Hispanic White                                  | 0.03 (-0.09 - 0.16)        | 73.4%  |
|                                                   | Non-Hispanic Black                                  | -0.12 (-0.43 - 0.19)       | 12.2%  |
|                                                   | Hispanic                                            | -0.16 (-0.50 - 0.17)       | 10.4%  |
|                                                   | Meta-analysis                                       | -0.03 (-0.14 - 0.08)       |        |
|                                                   | <i>P</i> value                                      | 0.6283                     |        |
|                                                   | Non-Hispanic White                                  | -0.02 (-0.15 - 0.10)       | 83.8%  |
|                                                   | Non-Hispanic Black                                  | 0.12 (-0.20 - 0.44)        | 11.7%  |
|                                                   | Hispanic                                            | 0.15 (-0.19 - 0.49)        | 10.2%  |
|                                                   | Non-Hispanic Asian                                  | 0.47 (-0.05 - 0.99)        | 4.3%   |
|                                                   | Meta-analysis                                       | 0.03 (-0.08 - 0.14)        |        |
|                                                   | <i>P</i> value                                      | 0.5501                     |        |

- The allelic and genotypic association models were evaluated using regression (additive model) adjusted for age, sex, education level, smoking status, and household income by racial/ethnic groups.

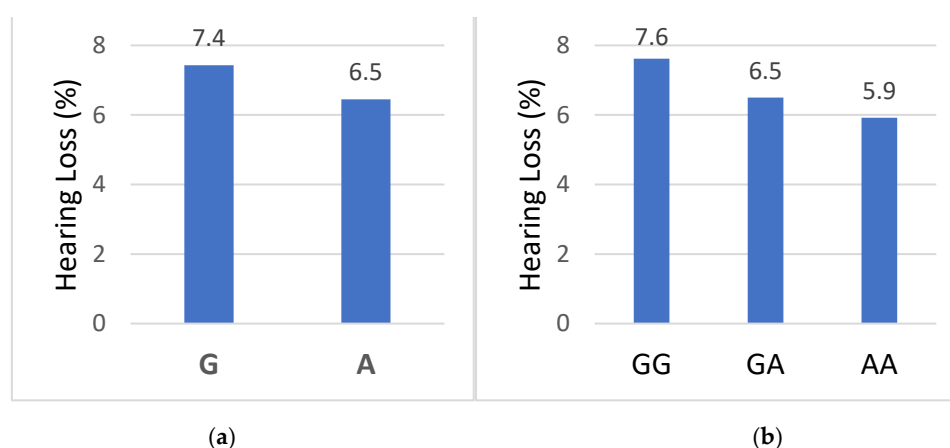

**Figure S1.** Prevalence of hearing loss by allele and genotype of rs1800497 (DDR2): (a) allele; (b): genotype.

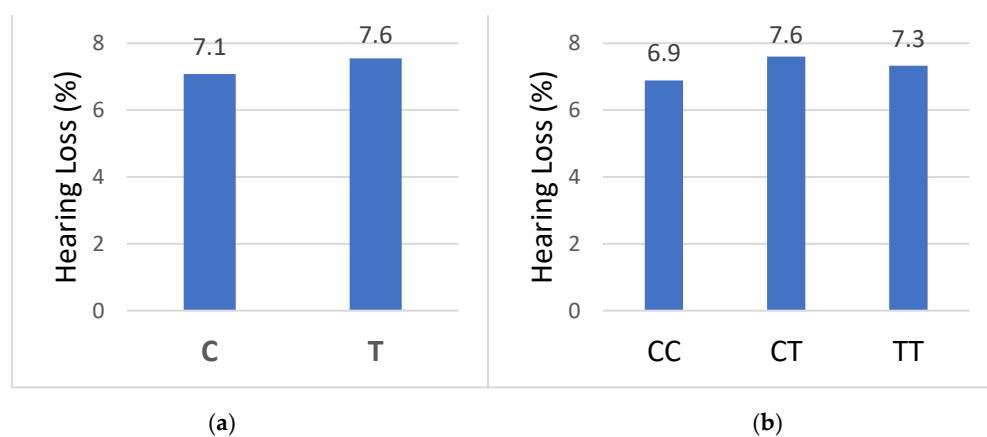

**Figure S2.** Prevalence of hearing loss by allele and genotype of rs12945042: (a) allele; (b): genotype.
